# Supplementary material for: A multipronged approach for the detection of leptospirosis in captive sloth bears (Melursus ursinus) in Agra and Bannerghatta sloth bear rescue centers in India
Source: PubMed Central journal article supplement — J Vet Med Sci. 2021 May 17;83(7):1059–67. doi: 10.1292/jvms.21-0082 (PMC8349803; doi:10.1292/jvms.21-0082), 2021-05-17

**Supplementary Figure 1**

**Figure Legend:** Serosanguinous fluid oozing out on opening of carcass during Post Mortem

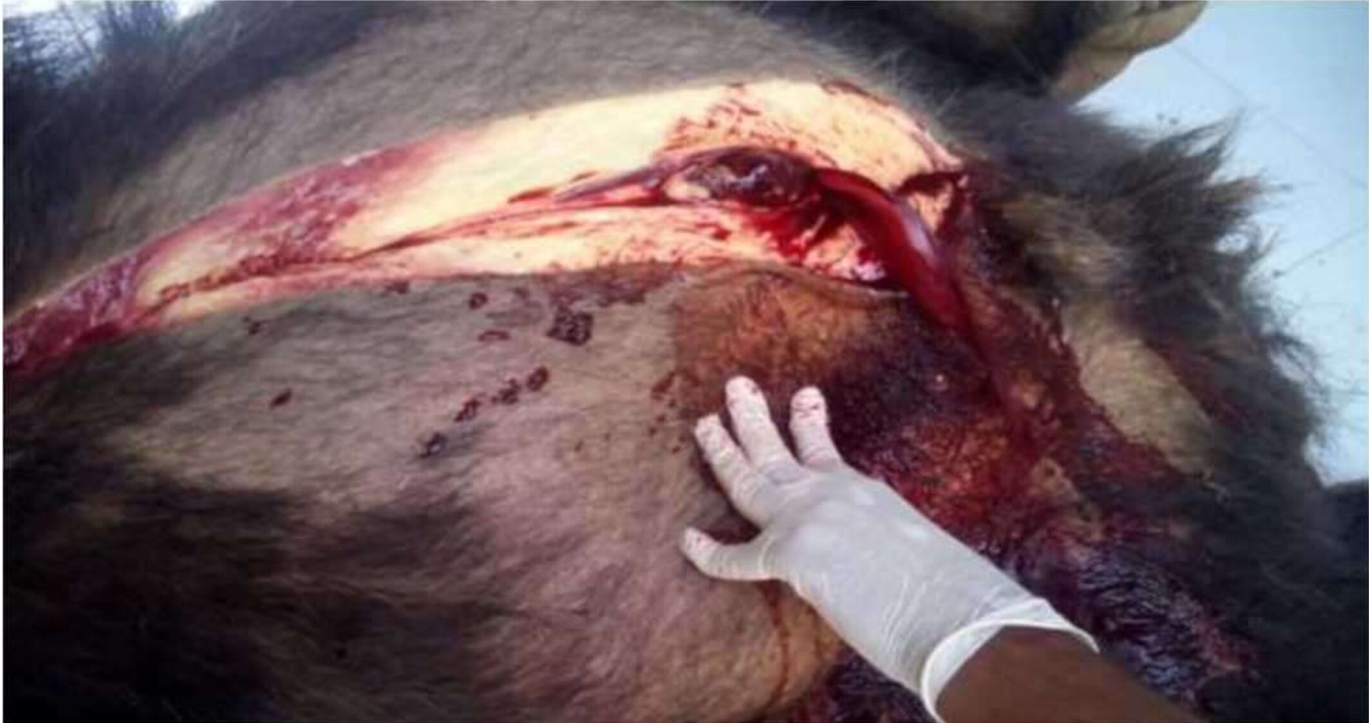

**Supplementary Figure 2**

**Figure Legend:** Highly congested and haemorrhagic soft and friable liver with distended gall bladder

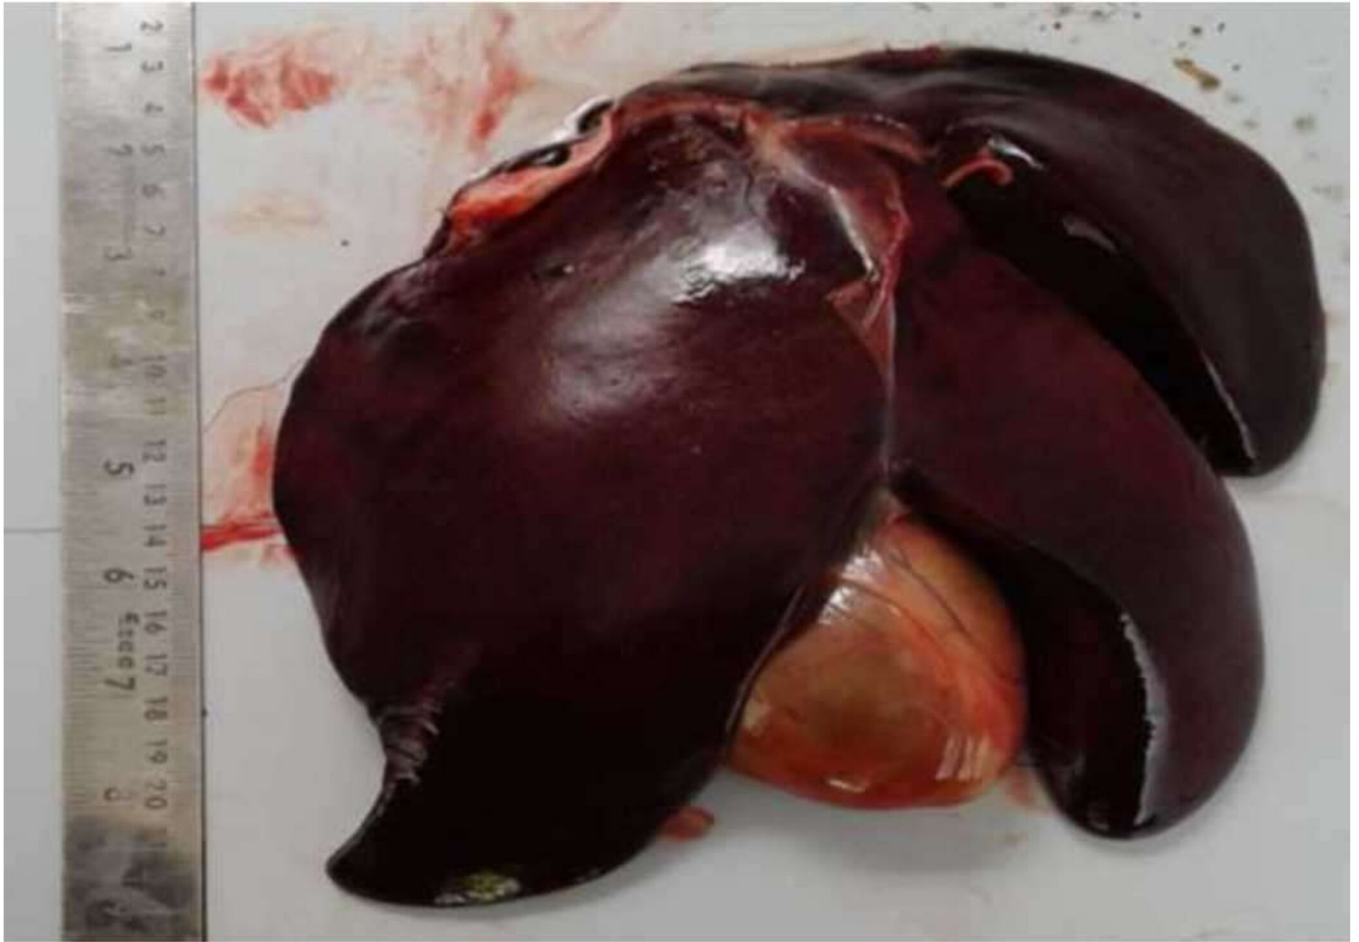

**Supplementary Figure 3**

**Figure Legend:** Histopathology of liver section showing severe hepatic degeneration

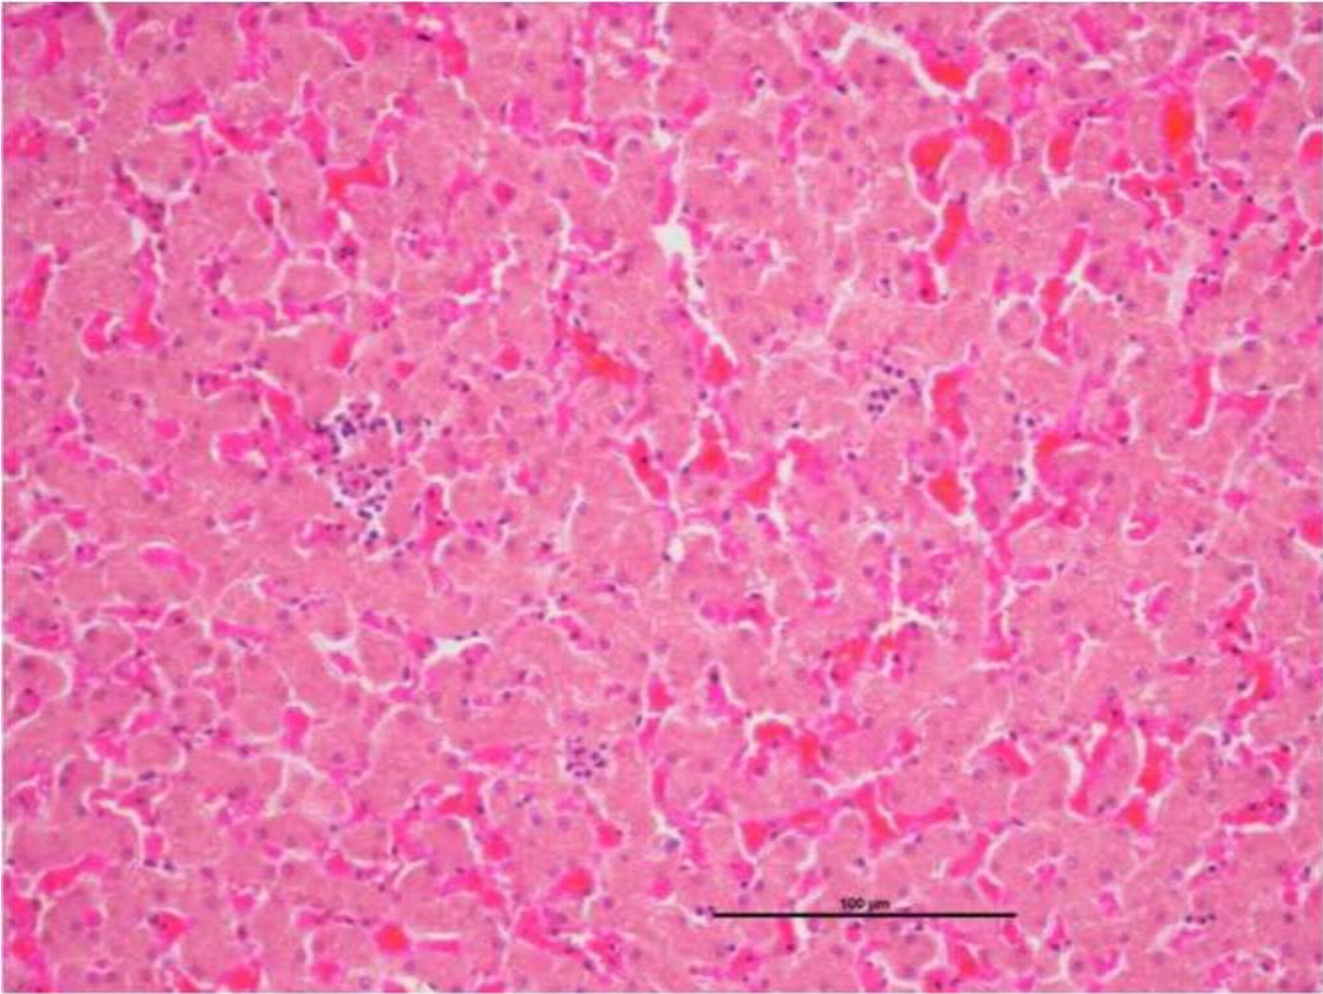

**Supplementary Figure 4**

**Figure Legend:** Multifocal areas of hepatic necrosis in the liver surrounded by inflammatory cells in liver parenchyma

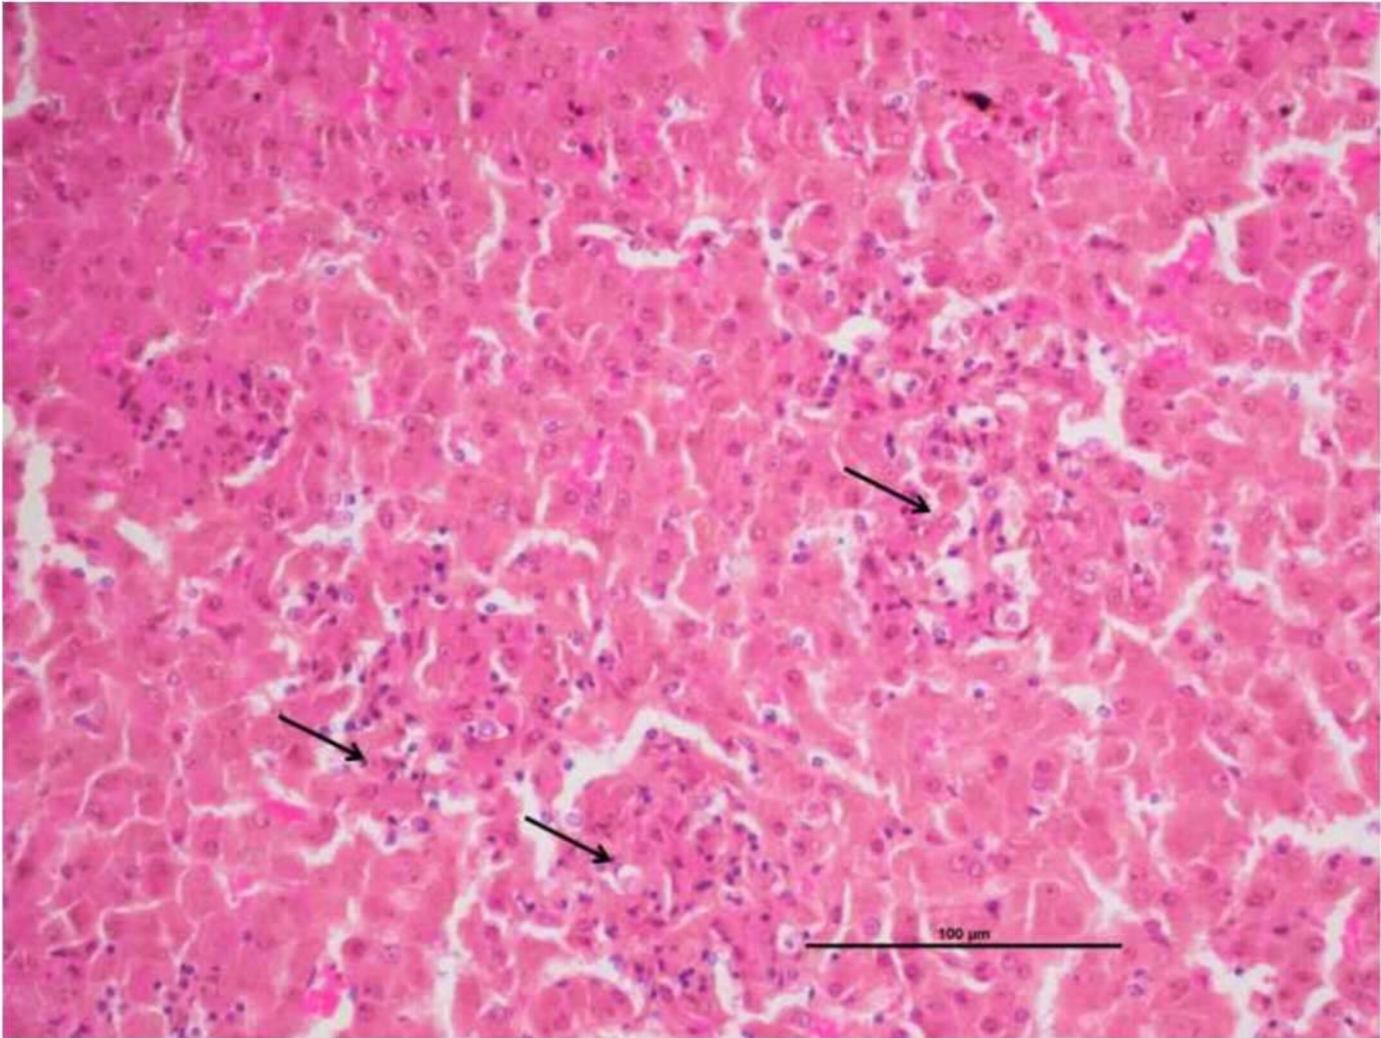

**Supplementary Figure 5**

**Figure Legend:** Severe lymphoplasmacytic and neutrophilic tubulointerstitial nephritis

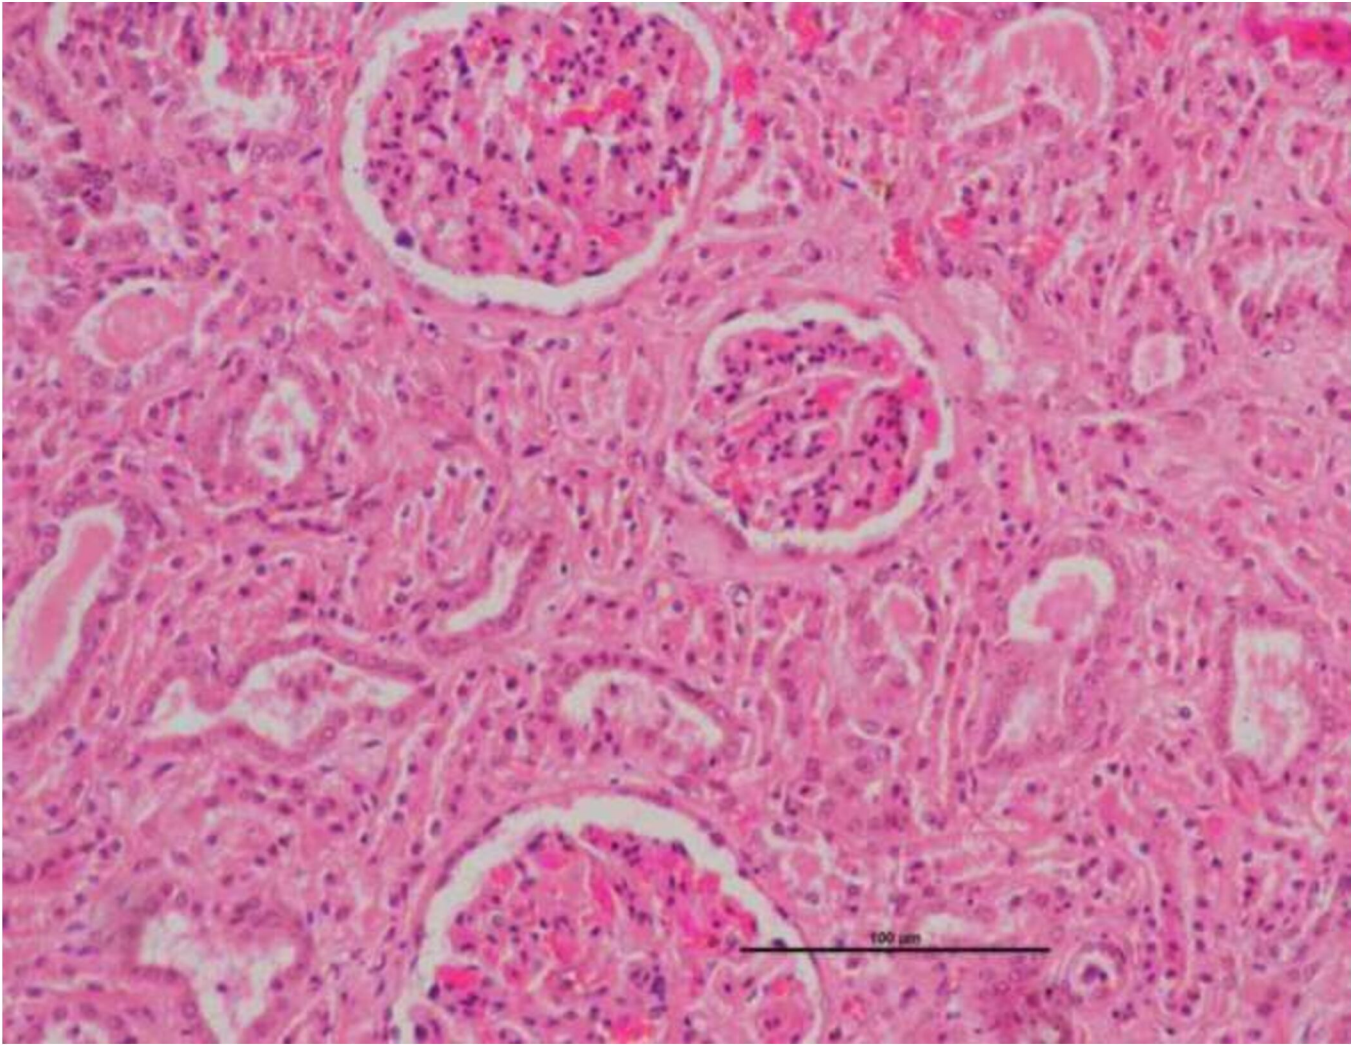

Supplement: jvms-83-1059-s001.pdf [file jvms-83-1059-s001.pdf]
